# Supplementary material for: Solvothermal synthesis and self-assembling mechanism of micro-nano spherical LiFePO4with high tap density
Source: Royal Society of Chemistry journal article supplement (doi:10.1039/c6ra13907h), 2016-01-01
Supplement: c6ra13907h1.pdf [file c6ra13907h1.pdf]

Supporting information for

# Solvothermal synthesis and self-assembling mechanism of micro-nano spherical $\text{LiFePO}_4$ with high tap density

Yuan Jin, Xincun Tang\* and Haiyan Wang\*

## Characterization of products

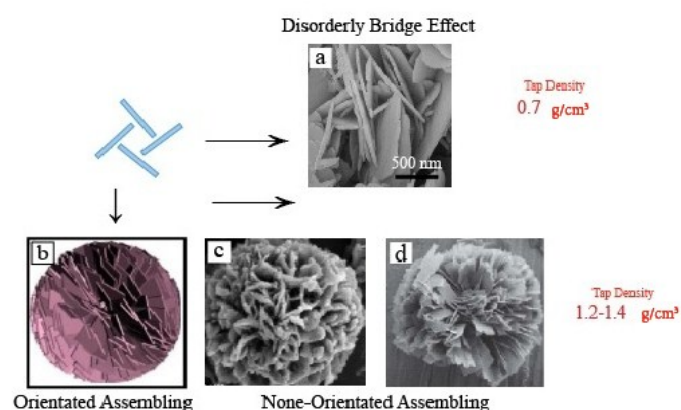

Fig.1a reference from *Electrochimica Acta*, 2010, 56(2): 995-999.  
Fig.1c reference from *J.Am.Chem.Soc.* 2011,133,2132-2135.  
Fig.1d reference from *CrystEngComm*, 2012,14,4284-4288.

Fig.S1. Schematic illustration of the nanosheet and the micro-nano spherical  $\text{LiFePO}_4$

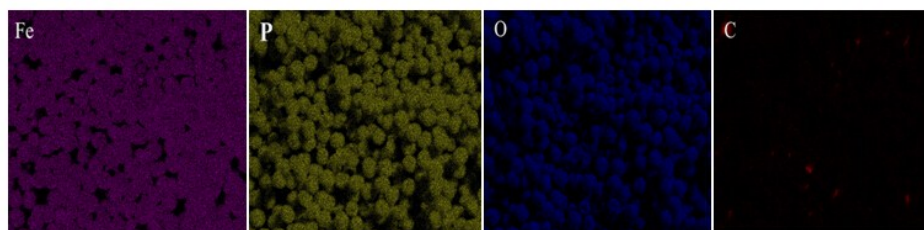

Fig. S2 EDS analysis of the  $\text{LiFePO}_4$  microsphere

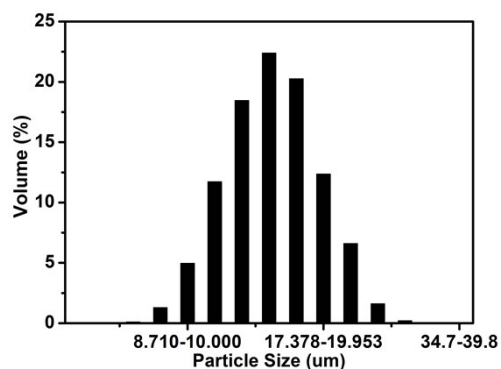

Fig. S3 Particle size distribution of LiFePO<sub>4</sub> microsphere.

As shown in Fig. S3, it is clear that the sample consists of uniform and monodisperse microsphere with the diameter of about 15  $\mu\text{m}$ .

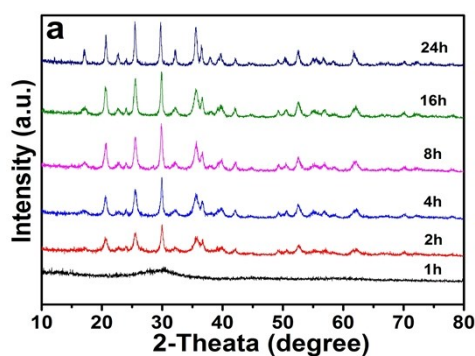

Fig. S4 XRD patterns of the LiFePO<sub>4</sub> microsphere prepared at different solvothermal time

XRD patterns of the LiFePO<sub>4</sub> microsphere prepared at different reaction time are shown in Fig. S4. When the reaction time was 1 h and 2 h, no obvious diffraction peak was observed and the sample was still in the amorphous state. As the reaction proceeded, the crystallinity of the sample increased significantly. After 24 h, LiFePO<sub>4</sub> crystal with high degree of crystallinity was obtained.

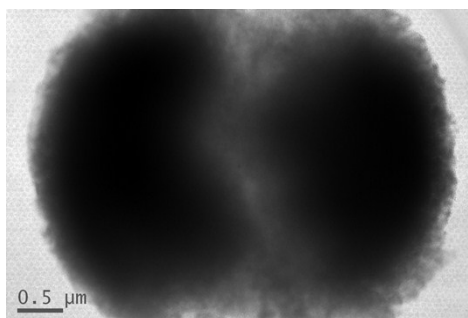

Fig.S5 TEM image of the saddle-shaped structure

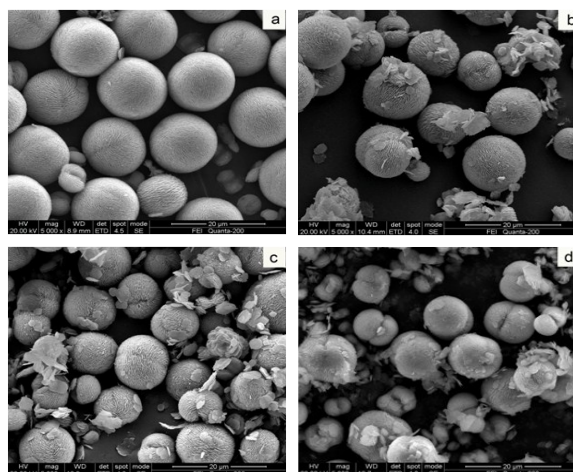

Fig. S6 SEM images of samples prepared with glycol solvent containing different content of deionized water (a) 0%; (b) 3%; (c) 5%; (d) 10%

As shown in Fig. S6, the more water content in solvent, the more fragments of non-orientated assembling nanosheets.

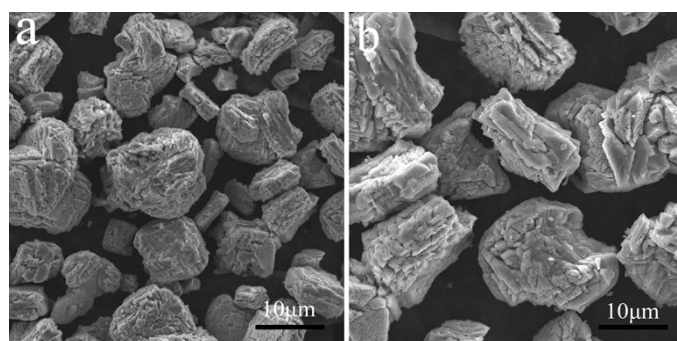

Fig.S7 SEM images of samples with deionized water as solvent

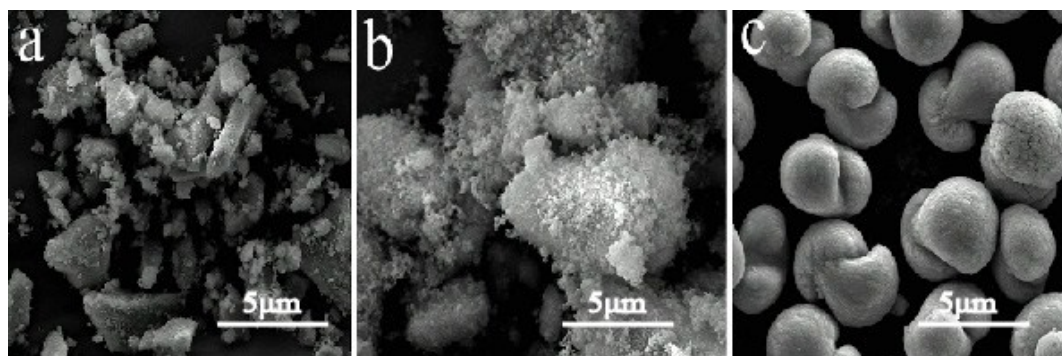

Fig. S8 SEM images of samples with diethylene glycol (a), 1,2-propylene glycol (b), isopropanol (c) as solvent

When the solvent was transformed to deionized water, diethylene glycol, 1,2-propylene glycol, isopropanol, the products obtained were not the micro-nano structure  $\text{LiFePO}_4$ .
